# Supplementary material for: The genomic basis of the plant island syndrome in Darwin’s giant daisies
Source: PubMed Central journal article supplement (PMC9240058; doi:10.1038/s41467-022-31280-w), 2022-06-28

## Supplementary Information

### The genomic basis of the plant island syndrome in Darwin's giant daisies

Cerca et al.

#### Table of contents

|                                                                                                                        |                |
|------------------------------------------------------------------------------------------------------------------------|----------------|
| Supplementary Table 01 Flow cytometry estimates                                                                        | <b>Page 2</b>  |
| Supplementary Table 02. Repeat and transposable element characterization of the <i>Scalesia atractyloides</i> assembly | <b>Page 3</b>  |
| Supplementary Table 03. Pairwise matrix of conserved orthologous sequences (COS) assignment.                           | <b>Page 4</b>  |
| Supplementary Table 04 Significantly enriched GO terms, Cellular components (CC).                                      | <b>Page 6</b>  |
| Supplementary Table 05. Significantly enriched GO terms, biological functions (BP).                                    | <b>Page 7</b>  |
| Supplementary Table 06. Significantly enriched GO terms, Biological functions (BP).                                    | <b>Page 9</b>  |
| Supplementary Table 07. Significantly enriched GO terms, Cellular component (CC).                                      | <b>Page 11</b> |
| Supplementary Table 08. Significantly enriched GO terms, Cellular component (CC).                                      | <b>Page 12</b> |
| Supplementary Table 09. Significantly enriched GO terms, Molecular Function (MF).                                      | <b>Page 13</b> |
| Supplementary Figure 01. IsoSeq Transcriptome data report.                                                             | <b>Page 15</b> |
| Supplementary Figure 02. Upset plot including five Asteraceae genome assemblies.                                       | <b>Page 16</b> |
| Supplementary Figure 03. Hierarchical clustering of selected $k$ -mers.                                                | <b>Page 17</b> |
| Supplementary Figure 04. $K_s$ plots.                                                                                  | <b>Page 18</b> |
| Supplementary Figure 05. Differences in transposable element and repeat content per subgenome.                         | <b>Page 19</b> |
| Supplementary Figure 06. Density distribution of pairwise comparisons of Jukes-Cantor divergence.                      | <b>Page 20</b> |
| Supplementary Figure 07. STRING analysis of <i>Scalesia</i> genes under selection.                                     | <b>Page 21</b> |

**Supplementary Table 01. Flow Cytometry estimates.** Genome size estimates in the studied species including average and standard deviation.

| Taxon                                        | 1C-Genome size (Gbp) |       |
|----------------------------------------------|----------------------|-------|
|                                              | Mean                 | SD    |
| <i>Scalesia atractyloides</i>                | 3.91                 | 0.070 |
| <i>Scalesia baurii</i> ssp. <i>hopkinsii</i> | 3.99                 | 0.036 |
| <i>Scalesia gordilloi</i>                    | 3.93                 | 0.089 |
| <i>Viguiera tucumanensis</i>                 | 3.83                 | 0.097 |

**Supplementary Table 02. Repeat and transposable element characterization of the *Scalesia atractyloides* assembly.** For each repeat or transposable element we include the number of elements, length in base pairs and % of the genome occupied.

| Element                            | Number of elements | Length occupied (bp) | % of sequence |
|------------------------------------|--------------------|----------------------|---------------|
| Retroelements                      | 808,501            | 1,569,493,759        | 48.79 %       |
| SINEs:                             | 0                  | 0                    | 0 %           |
| Penelope                           | 0                  | 0                    | 0 %           |
| LINES:                             | 45,417             | 28,617,548           | 0.89 %        |
| CRE/SLACS                          | 13,623             | 6,564,519            | 0.20 %        |
| L2/CR1/Rex                         | 3,042              | 4,713,410            | 0.15 %        |
| R1/LOA/Jockey                      | 0                  | 0                    | 0 %           |
| R2/R4/NeSL                         | 0                  | 0                    | 0 %           |
| RTE/Bov-B                          | 6,128              | 2,342,838            | 0.07%         |
| L1/CIN4                            | 22,624             | 14,996,781           | 0.47 %        |
| LTR elements:                      | 763,084            | 1,540,876,211        | 47.9 %        |
| BEL/Pao                            | 0                  | 0                    | 0 %           |
| Ty1/Copia                          | 276,179            | 521,239,565          | 16.2 %        |
| Gypsy/DIRS1                        | 482,535            | 1,014,580,035        | 31.54 %       |
| Retroviral                         | 0                  | 0                    | 0 %           |
| DNA transposons                    | 71,490             | 32,877,488           | 1.02 %        |
| hobo-Activator                     | 17,945             | 6,852,805            | 0.21 %        |
| Tc1-IS630-Pogo                     | 0                  | 0                    | 0 %           |
| En-Spm                             | 0                  | 0                    | 0 %           |
| MuDR-IS905                         | 0                  | 0                    | 0 %           |
| PiggyBac                           | 0                  | 0                    | 0 %           |
| Tourist/Harbinger                  | 30,205             | 12,698,648           | 0.39 %        |
| Other (Mirage, P-element, Transib) | 0                  | 0                    | 0 %           |
| Rolling-circles                    | 7,490              | 2,744,511            | 0.09 %        |
| Unclassified                       | 2,037,841          | 846,577,345          | 26.32 %       |
| Total interspersed repeats         | -                  | 2,448,948,592        | 76.13 %       |
| Small RNA                          | 0                  | 0                    | 0 %           |
| Satellites                         | 0                  | 0                    | 0 %           |
| Simple repeats                     | 524                | 73,608               | 0 %           |
| Low complexity                     | 0                  | 0                    | 0 %           |

**Supplementary Table 03. Pairwise matrix of conserved orthologous sequences (COS) assignment.** We identified duplicate-COS and their genomic location, numbering the number of common COS per chromosome model. For instance, chr10 had a total of 47 COS detected. We detected 39 duplicate COS-pairs shared with chr116, 1 shared with chr27, and another shared with chr7. Green colours show >10 matches, orange shows 3-10 matches, and yellow shows 1-2 matches.

|      | 1  | 10 | 11 | 116 | 12 | 13 | 14 | 15 | 16 | 163<br>2 | 163<br>3 | 163<br>4 | 17 | 18 | 19 | 2  | 20 | 21 | 22 | 23 | 24 | 25 | 26 | 27 | 28 | 29 | 3 | 30 | 4 | 5 | 6 | 7 | 8 | 9 |
|------|----|----|----|-----|----|----|----|----|----|----------|----------|----------|----|----|----|----|----|----|----|----|----|----|----|----|----|----|---|----|---|---|---|---|---|---|
| 1    | 27 | -  | -  | -   | -  | -  | -  | -  | -  | -        | -        | -        | -  | -  | -  | -  | -  | -  | -  | -  | -  | -  | -  | -  | -  | -  | - | -  | - | - | - | - | - | - |
| 10   | 0  | 47 | -  | -   | -  | -  | -  | -  | -  | -        | -        | -        | -  | -  | -  | -  | -  | -  | -  | -  | -  | -  | -  | -  | -  | -  | - | -  | - | - | - | - | - | - |
| 11   | 0  | 0  | 42 | -   | -  | -  | -  | -  | -  | -        | -        | -        | -  | -  | -  | -  | -  | -  | -  | -  | -  | -  | -  | -  | -  | -  | - | -  | - | - | - | - | - | - |
| 116  | 0  | 39 | 0  | 48  | -  | -  | -  | -  | -  | -        | -        | -        | -  | -  | -  | -  | -  | -  | -  | -  | -  | -  | -  | -  | -  | -  | - | -  | - | - | - | - | - | - |
| 12   | 0  | 0  | 0  | 0   | 38 | -  | -  | -  | -  | -        | -        | -        | -  | -  | -  | -  | -  | -  | -  | -  | -  | -  | -  | -  | -  | -  | - | -  | - | - | - | - | - | - |
| 13   | 0  | 0  | 0  | 0   | 0  | 23 | -  | -  | -  | -        | -        | -        | -  | -  | -  | -  | -  | -  | -  | -  | -  | -  | -  | -  | -  | -  | - | -  | - | - | - | - | - | - |
| 14   | 0  | 0  | 0  | 0   | 0  | 0  | 42 | -  | -  | -        | -        | -        | -  | -  | -  | -  | -  | -  | -  | -  | -  | -  | -  | -  | -  | -  | - | -  | - | - | - | - | - | - |
| 15   | 0  | 0  | 0  | 0   | 0  | 15 | 0  | 26 | -  | -        | -        | -        | -  | -  | -  | -  | -  | -  | -  | -  | -  | -  | -  | -  | -  | -  | - | -  | - | - | - | - | - | - |
| 16   | 14 | 0  | 0  | 0   | 0  | 0  | 1  | 0  | 46 | -        | -        | -        | -  | -  | -  | -  | -  | -  | -  | -  | -  | -  | -  | -  | -  | -  | - | -  | - | - | - | - | - | - |
| 1632 | 0  | 0  | 0  | 0   | 0  | 0  | 0  | 0  | 0  | 39       | -        | -        | -  | -  | -  | -  | -  | -  | -  | -  | -  | -  | -  | -  | -  | -  | - | -  | - | - | - | - | - | - |
| 1633 | 0  | 0  | 0  | 0   | 0  | 0  | 0  | 0  | 0  | 0        | 21       | -        | -  | -  | -  | -  | -  | -  | -  | -  | -  | -  | -  | -  | -  | -  | - | -  | - | - | - | - | - | - |
| 1634 | 8  | 0  | 0  | 0   | 0  | 0  | 0  | 0  | 0  | 1        | 0        | 33       | -  | -  | -  | -  | -  | -  | -  | -  | -  | -  | -  | -  | -  | -  | - | -  | - | - | - | - | - | - |
| 17   | 0  | 0  | 0  | 0   | 0  | 0  | 0  | 0  | 0  | 0        | 0        | 0        | 36 | -  | -  | -  | -  | -  | -  | -  | -  | -  | -  | -  | -  | -  | - | -  | - | - | - | - | - | - |
| 18   | 0  | 0  | 0  | 0   | 0  | 0  | 0  | 0  | 0  | 0        | 0        | 0        | 0  | 28 | -  | -  | -  | -  | -  | -  | -  | -  | -  | -  | -  | -  | - | -  | - | - | - | - | - | - |
| 19   | 0  | 0  | 0  | 0   | 0  | 0  | 0  | 0  | 0  | 0        | 0        | 0        | 0  | 0  | 29 | -  | -  | -  | -  | -  | -  | -  | -  | -  | -  | -  | - | -  | - | - | - | - | - | - |
| 2    | 0  | 0  | 0  | 0   | 0  | 0  | 0  | 0  | 0  | 0        | 0        | 0        | 0  | 0  | 0  | 32 | -  | -  | -  | -  | -  | -  | -  | -  | -  | -  | - | -  | - | - | - | - | - | - |
| 20   | 0  | 0  | 0  | 0   | 0  | 0  | 0  | 0  | 0  | 0        | 13       | 0        | 0  | 0  | 0  | 0  | 30 | -  | -  | -  | -  | -  | -  | -  | -  | -  | - | -  | - | - | - | - | - | - |
| 21   | 0  | 0  | 0  | 0   | 1  | 0  | 0  | 0  | 0  | 0        | 0        | 0        | 0  | 0  | 0  | 0  | 0  | 25 | -  | -  | -  | -  | -  | -  | -  | -  | - | -  | - | - | - | - | - | - |
| 22   | 0  | 0  | 0  | 0   | 0  | 0  | 0  | 0  | 15 | 0        | 0        | 0        | 0  | 0  | 0  | 1  | 0  | 14 | 37 | -  | -  | -  | -  | -  | -  | -  | - | -  | - | - | - | - | - | - |
| 23   | 0  | 0  | 0  | 0   | 0  | 0  | 34 | 0  | 0  | 0        | 0        | 0        | 0  | 0  | 0  | 0  | 0  | 0  | 45 | -  | -  | -  | -  | -  | -  | -  | - | -  | - | - | - | - | - | - |
| 24   | 0  | 0  | 0  | 0   | 0  | 0  | 0  | 0  | 0  | 0        | 0        | 0        | 0  | 0  | 0  | 0  | 10 | 0  | 0  | 23 | -  | -  | -  | -  | -  | -  | - | -  | - | - | - | - | - | - |
| 25   | 0  | 0  | 0  | 0   | 33 | 0  | 0  | 0  | 0  | 0        | 0        | 0        | 0  | 0  | 0  | 0  | 0  | 0  | 0  | 35 | -  | -  | -  | -  | -  | -  | - | -  | - | - | - | - | - | - |
| 26   | 0  | 0  | 0  | 0   | 0  | 0  | 0  | 0  | 0  | 0        | 0        | 32       | 0  | 0  | 0  | 0  | 0  | 0  | 0  | 0  | 42 | -  | -  | -  | -  | -  | - | -  | - | - | - | - | - | - |

|    |   |   |    |   |   |   |   |   |   |    |    |   |    |    |   |   |   |   |   |   |   |   |   |    |    |    |   |   |   |   |    |    |    |    |    |   |    |    |   |
|----|---|---|----|---|---|---|---|---|---|----|----|---|----|----|---|---|---|---|---|---|---|---|---|----|----|----|---|---|---|---|----|----|----|----|----|---|----|----|---|
| 27 | 0 | 1 | 0  | 0 | 0 | 0 | 0 | 0 | 0 | 0  | 0  | 0 | 25 | 0  | 0 | 0 | 0 | 0 | 0 | 0 | 0 | 0 | 0 | 28 | -  | -  | - | - | - | - | -  | -  | -  | -  | -  | - | -  |    |   |
| 28 | 0 | 0 | 0  | 0 | 0 | 0 | 0 | 5 | 0 | 0  | 19 | 0 | 0  | 0  | 0 | 0 | 0 | 0 | 0 | 0 | 2 | 0 | 0 | 0  | 27 | -  | - | - | - | - | -  | -  | -  | -  | -  | - | -  |    |   |
| 29 | 0 | 0 | 0  | 0 | 0 | 0 | 0 | 0 | 0 | 0  | 0  | 0 | 0  | 0  | 0 | 0 | 0 | 0 | 0 | 0 | 0 | 0 | 0 | 0  | 25 | -  | - | - | - | - | -  | -  | -  | -  | -  | - | -  |    |   |
| 3  | 0 | 0 | 0  | 0 | 0 | 0 | 0 | 2 | 0 | 0  | 0  | 0 | 0  | 0  | 0 | 0 | 0 | 0 | 0 | 0 | 1 | 3 | 0 | 0  | 0  | 22 | - | - | - | - | -  | -  | -  | -  | -  | - | -  |    |   |
| 30 | 0 | 0 | 36 | 0 | 0 | 0 | 0 | 0 | 0 | 0  | 0  | 0 | 0  | 0  | 0 | 0 | 0 | 0 | 0 | 0 | 0 | 0 | 0 | 0  | 0  | 0  | 0 | 0 | 0 | 0 | 0  | 0  | 30 | -  | -  | - | -  | -  |   |
| 4  | 0 | 0 | 0  | 0 | 0 | 0 | 0 | 1 | 0 | 0  | 0  | 0 | 0  | 28 | 0 | 0 | 0 | 0 | 0 | 0 | 1 | 0 | 0 | 0  | 0  | 0  | 0 | 0 | 0 | 0 | 0  | 0  | 34 | -  | -  | - | -  | -  |   |
| 5  | 0 | 0 | 1  | 0 | 0 | 0 | 0 | 0 | 0 | 0  | 0  | 0 | 0  | 0  | 0 | 0 | 0 | 0 | 0 | 0 | 0 | 0 | 0 | 0  | 0  | 23 | 0 | 0 | 0 | 0 | 35 | -  | -  | -  | -  | - | -  |    |   |
| 6  | 0 | 0 | 0  | 0 | 0 | 0 | 0 | 0 | 0 | 0  | 0  | 0 | 0  | 0  | 0 | 0 | 0 | 0 | 0 | 0 | 0 | 0 | 0 | 0  | 0  | 0  | 7 | 0 | 0 | 0 | 0  | 35 | -  | -  | -  | - | -  | -  |   |
| 7  | 0 | 1 | 0  | 0 | 0 | 1 | 0 | 0 | 0 | 0  | 0  | 0 | 0  | 1  | 0 | 0 | 6 | 0 | 0 | 0 | 0 | 0 | 0 | 0  | 0  | 0  | 0 | 0 | 0 | 0 | 0  | 0  | 0  | 17 | 28 | - | -  | -  | - |
| 8  | 0 | 0 | 0  | 0 | 0 | 0 | 0 | 0 | 0 | 0  | 0  | 0 | 27 | 0  | 0 | 0 | 0 | 0 | 0 | 0 | 0 | 0 | 0 | 0  | 0  | 0  | 0 | 0 | 0 | 0 | 0  | 0  | 1  | 0  | 0  | 0 | 29 | -  |   |
| 9  | 0 | 0 | 0  | 0 | 0 | 0 | 0 | 0 | 0 | 33 | 0  | 0 | 0  | 0  | 0 | 0 | 0 | 0 | 0 | 0 | 0 | 0 | 0 | 0  | 0  | 0  | 0 | 0 | 0 | 0 | 0  | 0  | 0  | 0  | 0  | 0 | 0  | 40 | - |

**Supplementary Table 04 Significantly enriched GO terms, Cellular components (CC).** CC-GOs were obtained for the 920 genes under selection. We provide a GO-Id, the term, its annotation, the significance and expected value and the P-value (elimFisher calculated, one-sided test) for each GO.

| ID | Term       | Annotated                                   | Significant | Expected | elimFisher |
|----|------------|---------------------------------------------|-------------|----------|------------|
| 1  | GO:0005872 | minus-end kinesin complex                   | 96          | 8        | 0.0014     |
| 2  | GO:0072686 | mitotic spindle                             | 130         | 9        | 0.0026     |
| 3  | GO:0032153 | cell division site                          | 119         | 8        | 0.0054     |
| 4  | GO:0005778 | peroxisomal membrane                        | 1185        | 40       | 0.0068     |
| 5  | GO:0031461 | cullin-RING ubiquitin ligase complex        | 585         | 23       | 0.0069     |
| 6  | GO:0000776 | kinetochore                                 | 399         | 17       | 0.0090     |
| 7  | GO:0005876 | spindle microtubule                         | 720         | 26       | 0.0121     |
| 8  | GO:0031519 | PcG protein complex                         | 66          | 5        | 0.0160     |
| 9  | GO:0005694 | chromosome                                  | 2165        | 69       | 0.0221     |
| 10 | GO:0030142 | COPI-coated Golgi to ER transport vesicl... | 1           | 1        | 0.0223     |
| 11 | GO:0000229 | cytoplasmic chromosome                      | 214         | 10       | 0.0228     |
| 12 | GO:0009508 | plastid chromosome                          | 214         | 10       | 0.0228     |
| 13 | GO:0000777 | condensed chromosome kinetochore            | 154         | 8        | 0.0228     |
| 14 | GO:0000779 | condensed chromosome, centromeric region    | 154         | 8        | 0.0228     |
| 15 | GO:0035102 | PRC1 complex                                | 11          | 2        | 0.0240     |
| 16 | GO:0035861 | site of double-strand break                 | 11          | 2        | 0.0240     |
| 17 | GO:0090734 | site of DNA damage                          | 11          | 2        | 0.0240     |
| 18 | GO:0005677 | chromatin silencing complex                 | 76          | 5        | 0.0277     |
| 19 | GO:0000152 | nuclear ubiquitin ligase complex            | 104         | 6        | 0.0294     |
| 20 | GO:0055028 | cortical microtubule                        | 827         | 27       | 0.0334     |
| 21 | GO:0031463 | Cul3-RING ubiquitin ligase complex          | 56          | 4        | 0.0364     |
| 22 | GO:0030981 | cortical microtubule cytoskeleton           | 834         | 27       | 0.0364     |
| 23 | GO:0005881 | cytoplasmic microtubule                     | 837         | 27       | 0.0378     |
| 24 | GO:0030863 | cortical cytoskeleton                       | 846         | 27       | 0.0422     |
| 25 | GO:0070939 | Dsl1/NZR complex                            | 2           | 1        | 0.0442     |
| 26 | GO:1990879 | CST complex                                 | 2           | 1        | 0.0442     |
| 27 | GO:0009537 | proplastid                                  | 2           | 1        | 0.0442     |
| 28 | GO:0009528 | plastid inner membrane                      | 964         | 30       | 0.0443     |
| 29 | GO:0000151 | ubiquitin ligase complex                    | 702         | 29       | 0.0452     |

**Supplementary Table 05. Significantly enriched GO terms, biological functions (BP).** BP-GOs were obtained for the *contracted gene families*. We provide a GO-Id, the term, its annotation, the significance and expected values and the P-value (elimFisher calculated, one-sided test) for each GO.

| ID | Term       | Annotated                                   | Significant | Expected | elimFisher |
|----|------------|---------------------------------------------|-------------|----------|------------|
| 1  | GO:0051865 | protein autoubiquitination                  | 222         | 13       | 5.8e-20    |
| 2  | GO:1902006 | negative regulation of proline biosynthe... | 20          | 8        | 9.2e-20    |
| 3  | GO:1903553 | positive regulation of extracellular exo... | 6           | 6        | 9.8e-19    |
| 4  | GO:0061635 | regulation of protein complex stability     | 26          | 8        | 1.1e-18    |
| 5  | GO:0071629 | cytoplasm protein quality control by the... | 47          | 8        | 2.3e-16    |
| 6  | GO:0009414 | response to water deprivation               | 8037        | 32       | 1.2e-15    |
| 7  | GO:1903533 | regulation of protein targeting             | 16          | 6        | 7.8e-15    |
| 8  | GO:0060178 | regulation of exocyst localization          | 25          | 6        | 1.7e-13    |
| 9  | GO:0010600 | regulation of auxin biosynthetic process    | 194         | 9        | 4.7e-13    |
| 10 | GO:0009901 | anther dehiscence                           | 662         | 12       | 2.3e-12    |
| 11 | GO:0010966 | regulation of phosphate transport           | 45          | 6        | 7.7e-12    |
| 12 | GO:0090378 | seed trichome elongation                    | 202         | 8        | 3.8e-11    |
| 13 | GO:0033591 | response to L-ascorbic acid                 | 28          | 5        | 1.0e-10    |
| 14 | GO:0006513 | protein monoubiquitination                  | 40          | 5        | 6.8e-10    |
| 15 | GO:0000209 | protein polyubiquitination                  | 384         | 8        | 6.1e-09    |
| 16 | GO:0009630 | gravitropism                                | 1997        | 14       | 6.5e-09    |
| 17 | GO:0009938 | negative regulation of gibberellic acid ... | 437         | 8        | 1.7e-08    |
| 18 | GO:0043562 | cellular response to nitrogen levels        | 464         | 8        | 2.7e-08    |
| 19 | GO:0009684 | indoleacetic acid biosynthetic process      | 717         | 9        | 4.8e-08    |
| 20 | GO:0090059 | protoxylem development                      | 195         | 6        | 6.0e-08    |
| 21 | GO:0048759 | xylem vessel member cell differentiation    | 203         | 6        | 7.6e-08    |
| 22 | GO:0006887 | exocytosis                                  | 262         | 6        | 3.4e-07    |
| 23 | GO:0010200 | response to chitin                          | 3600        | 15       | 1.5e-06    |
| 24 | GO:2000024 | regulation of leaf development              | 2304        | 11       | 1.8e-05    |
| 25 | GO:0071456 | cellular response to hypoxia                | 5729        | 17       | 2.4e-05    |
| 26 | GO:0030104 | water homeostasis                           | 2237        | 10       | 8.4e-05    |
| 27 | GO:0070417 | cellular response to cold                   | 727         | 6        | 0.00011    |
| 28 | GO:0036377 | arbuscular mycorrhizal association          | 741         | 6        | 0.00013    |
| 29 | GO:0009787 | regulation of abscisic acid-activated si... | 4389        | 17       | 0.00013    |
| 30 | GO:0010252 | auxin homeostasis                           | 776         | 6        | 0.00016    |
| 31 | GO:0033993 | response to lipid                           | 11211       | 33       | 0.00019    |
| 32 | GO:0062034 | L-pipecolic acid biosynthetic process       | 27          | 2        | 0.00039    |
| 33 | GO:1902290 | positive regulation of defense response ... | 926         | 6        | 0.00042    |
| 34 | GO:0009742 | brassinosteroid mediated signaling pathw... | 3265        | 11       | 0.00042    |

|    |            |                                             |       |    |         |
|----|------------|---------------------------------------------|-------|----|---------|
| 35 | GO:0002238 | response to molecule of fungal origin       | 3299  | 11 | 0.00046 |
| 36 | GO:0033506 | glucosinolate biosynthetic process from ... | 32    | 2  | 0.00055 |
| 37 | GO:0006511 | ubiquitin-dependent protein catabolic pr... | 1382  | 14 | 0.00063 |
| 38 | GO:1901701 | cellular response to oxygen-containing c... | 10052 | 32 | 0.00072 |
| 39 | GO:0009789 | positive regulation of abscisic acid-act... | 2943  | 10 | 0.00078 |
| 40 | GO:0001173 | DNA-templated transcriptional start site... | 1     | 1  | 0.00108 |
| 41 | GO:0043392 | negative regulation of DNA binding          | 1     | 1  | 0.00108 |
| 42 | GO:2000280 | regulation of root development              | 3667  | 11 | 0.00114 |
| 43 | GO:0009735 | response to cytokinin                       | 3272  | 10 | 0.00178 |
| 44 | GO:2000070 | regulation of response to water deprivat... | 3366  | 10 | 0.00220 |
| 45 | GO:0050832 | defense response to fungus                  | 7460  | 16 | 0.00235 |
| 46 | GO:0046621 | negative regulation of organ growth         | 72    | 2  | 0.00274 |
| 47 | GO:0047484 | regulation of response to osmotic stress    | 3551  | 10 | 0.00328 |
| 48 | GO:0048731 | system development                          | 16694 | 33 | 0.00338 |
| 49 | GO:0090333 | regulation of stomatal closure              | 2424  | 8  | 0.00355 |
| 50 | GO:0009610 | response to symbiotic fungus                | 1985  | 7  | 0.00460 |
| 51 | GO:0009609 | response to symbiotic bacterium             | 1529  | 6  | 0.00534 |
| 52 | GO:0009725 | response to hormone                         | 14346 | 33 | 0.00556 |
| 53 | GO:0048831 | regulation of shoot system development      | 6119  | 19 | 0.00657 |
| 54 | GO:2000652 | regulation of secondary cell wall biogen... | 2202  | 7  | 0.00805 |
| 55 | GO:1900426 | positive regulation of defense response ... | 2270  | 7  | 0.00945 |
| 56 | GO:1901420 | negative regulation of response to alcoh... | 3023  | 8  | 0.01314 |
| 57 | GO:1905958 | negative regulation of cellular response... | 3023  | 8  | 0.01314 |
| 58 | GO:0009788 | negative regulation of abscisic acid-act... | 3023  | 8  | 0.01314 |
| 59 | GO:0002237 | response to molecule of bacterial origin    | 3156  | 8  | 0.01675 |
| 60 | GO:0043068 | positive regulation of programmed cell d... | 931   | 4  | 0.01725 |
| 61 | GO:0071310 | cellular response to organic substance      | 11202 | 31 | 0.01734 |
| 62 | GO:0042742 | defense response to bacterium               | 8510  | 18 | 0.01738 |
| 63 | GO:0009737 | response to abscisic acid                   | 9526  | 24 | 0.02823 |
| 64 | GO:0097305 | response to alcohol                         | 9617  | 24 | 0.03087 |
| 65 | GO:0009617 | response to bacterium                       | 9246  | 18 | 0.03209 |
| 66 | GO:0071396 | cellular response to lipid                  | 7800  | 29 | 0.03449 |
| 67 | GO:1900150 | regulation of defense response to fungus    | 2955  | 7  | 0.03531 |
| 68 | GO:0052542 | defense response by callose deposition      | 3706  | 8  | 0.03962 |
| 69 | GO:0042631 | cellular response to water deprivation      | 2495  | 6  | 0.04801 |



**Supplementary Table 06. Significantly enriched GO terms, Biological functions (BP).** BP-GOs were obtained for the *expanded gene families*. We provide a GO-Id, the term, its annotation, the significance and expected values and the P-value (elimFisher calculated, one-sided test) for each GO.

| ID | Term       | Annotated                                   | Significant | Expected | elimFisher |
|----|------------|---------------------------------------------|-------------|----------|------------|
| 1  | GO:0033486 | delphinidin 3-O-glucoside biosynthetic p... | 33          | 33       | < 1e-30    |
| 2  | GO:0050766 | positive regulation of phagocytosis         | 29          | 29       | < 1e-30    |
| 3  | GO:0010466 | negative regulation of peptidase activit... | 83          | 57       | < 1e-30    |
| 4  | GO:0030187 | melatonin biosynthetic process              | 72          | 34       | < 1e-30    |
| 5  | GO:0010951 | negative regulation of endopeptidase act... | 55          | 29       | < 1e-30    |
| 6  | GO:0015976 | carbon utilization                          | 60          | 29       | < 1e-30    |
| 7  | GO:1901847 | nicotinate metabolic process                | 87          | 30       | < 1e-30    |
| 8  | GO:0006730 | one-carbon metabolic process                | 92          | 30       | < 1e-30    |
| 9  | GO:0009710 | tropane alkaloid biosynthetic process       | 126         | 32       | < 1e-30    |
| 10 | GO:0009701 | isoflavonoid phytoalexin biosynthetic pr... | 58          | 25       | < 1e-30    |
| 11 | GO:0006020 | inositol metabolic process                  | 166         | 33       | < 1e-30    |
| 12 | GO:0002103 | endonucleolytic cleavage of tetracistron... | 16          | 14       | 8.9e-27    |
| 13 | GO:0030497 | fatty acid elongation                       | 159         | 28       | 1.1e-26    |
| 14 | GO:0033485 | cyanidin 3-O-glucoside biosynthetic proc... | 302         | 33       | 2.3e-24    |
| 15 | GO:0009807 | lignan biosynthetic process                 | 127         | 24       | 8.2e-24    |
| 16 | GO:0051851 | modulation by host of symbiont process      | 90          | 21       | 4.7e-23    |
| 17 | GO:0000290 | deadenylation-dependent decapping of nuc... | 21          | 12       | 2.2e-19    |
| 18 | GO:0032259 | methylation                                 | 2243        | 68       | 1.2e-16    |
| 19 | GO:0000305 | response to oxygen radical                  | 402         | 29       | 1.3e-16    |
| 20 | GO:0098869 | cellular oxidant detoxification             | 405         | 29       | 1.6e-16    |
| 21 | GO:0080024 | indolebutyric acid metabolic process        | 366         | 27       | 9.0e-16    |
| 22 | GO:0043473 | pigmentation                                | 655         | 33       | 3.4e-14    |
| 23 | GO:0006694 | steroid biosynthetic process                | 981         | 40       | 5.8e-14    |
| 24 | GO:0009772 | photosynthetic electron transport in pho... | 65          | 13       | 8.1e-14    |
| 25 | GO:0006666 | 3-keto-sphinganine metabolic process        | 21          | 9        | 2.4e-13    |
| 26 | GO:0051555 | flavonol biosynthetic process               | 766         | 34       | 4.9e-13    |
| 27 | GO:0009708 | benzyl isoquinoline alkaloid biosyntheti... | 658         | 31       | 1.2e-12    |
| 28 | GO:0080088 | spermidine hydroxycinnamate conjugate bi... | 742         | 32       | 5.3e-12    |
| 29 | GO:1990110 | callus formation                            | 713         | 29       | 2.2e-10    |
| 30 | GO:0000028 | ribosomal small subunit assembly            | 205         | 16       | 3.2e-10    |
| 31 | GO:0009820 | alkaloid metabolic process                  | 1887        | 95       | 4.0e-10    |
| 32 | GO:0080026 | response to indolebutyric acid              | 647         | 27       | 5.4e-10    |
| 33 | GO:0009805 | coumarin biosynthetic process               | 848         | 31       | 6.8e-10    |
| 34 | GO:0010597 | green leaf volatile biosynthetic process    | 975         | 30       | 6.3e-08    |

|    |            |                                             |      |    |         |
|----|------------|---------------------------------------------|------|----|---------|
| 35 | GO:0009759 | indole glucosinolate biosynthetic proces... | 1003 | 30 | 1.2e-07 |
| 36 | GO:0033962 | P-body assembly                             | 169  | 12 | 1.5e-07 |
| 37 | GO:0031640 | killing of cells of other organism          | 294  | 15 | 3.3e-07 |
| 38 | GO:0016554 | cytidine to uridine editing                 | 261  | 14 | 4.5e-07 |
| 39 | GO:0030148 | sphingolipid biosynthetic process           | 105  | 9  | 1.2e-06 |
| 40 | GO:0051289 | protein homotetramerization                 | 338  | 15 | 1.9e-06 |
| 41 | GO:0008033 | tRNA processing                             | 217  | 12 | 2.2e-06 |
| 42 | GO:0009809 | lignin biosynthetic process                 | 3911 | 68 | 3.4e-06 |
| 43 | GO:1900871 | chloroplast mRNA modification               | 68   | 7  | 5.4e-06 |
| 44 | GO:0080156 | mitochondrial mRNA modification             | 323  | 14 | 5.5e-06 |
| 45 | GO:0006561 | proline biosynthetic process                | 383  | 15 | 8.7e-06 |
| 46 | GO:0010197 | polar nucleus fusion                        | 360  | 14 | 1.9e-05 |
| 47 | GO:0071244 | cellular response to carbon dioxide         | 1284 | 29 | 4.3e-05 |
| 48 | GO:0006397 | mRNA processing                             | 1932 | 38 | 5.7e-05 |
| 49 | GO:0050830 | defense response to Gram-positive bacter... | 73   | 6  | 9.3e-05 |
| 50 | GO:0036377 | arbuscular mycorrhizal association          | 741  | 19 | 0.00020 |
| 51 | GO:0042542 | response to hydrogen peroxide               | 3539 | 56 | 0.00036 |
| 52 | GO:0031525 | menthol biosynthetic process                | 94   | 6  | 0.00037 |
| 53 | GO:0010115 | regulation of abscisic acid biosynthetic... | 537  | 15 | 0.00038 |
| 54 | GO:1900865 | chloroplast RNA modification                | 207  | 14 | 0.00046 |
| 55 | GO:0006885 | regulation of pH                            | 1617 | 29 | 0.00184 |
| 56 | GO:0006760 | folic acid-containing compound metabolic... | 131  | 6  | 0.00210 |
| 57 | GO:0006333 | chromatin assembly or disassembly           | 781  | 16 | 0.00577 |
| 58 | GO:0010304 | PSII associated light-harvesting complex... | 173  | 6  | 0.00812 |
| 59 | GO:0046677 | response to antibiotic                      | 83   | 4  | 0.00973 |
| 60 | GO:0009750 | response to fructose                        | 875  | 15 | 0.03132 |
| 61 | GO:0002213 | defense response to insect                  | 1781 | 26 | 0.03530 |
| 1  | GO:0033486 | delphinidin 3-O-glucoside biosynthetic p... | 33   | 33 | < 1e-30 |
| 2  | GO:0050766 | positive regulation of phagocytosis         | 29   | 29 | < 1e-30 |
| 3  | GO:0010466 | negative regulation of peptidase activit... | 83   | 57 | < 1e-30 |
| 4  | GO:0030187 | melatonin biosynthetic process              | 72   | 34 | < 1e-30 |
| 5  | GO:0010951 | negative regulation of endopeptidase act... | 55   | 29 | < 1e-30 |
| 6  | GO:0015976 | carbon utilization                          | 60   | 29 | < 1e-30 |
| 7  | GO:1901847 | nicotinate metabolic process                | 87   | 30 | < 1e-30 |
| 8  | GO:0006730 | one-carbon metabolic process                | 92   | 30 | < 1e-30 |

**Supplementary Table 07. Significantly enriched GO terms, Cellular component (CC).** CC-GOs were obtained for the *contracted gene families*. We provide a GO-Id, the term, its annotation, the significance and expected values and the P-value (elimFisher calculated, one-sided test) for each GO.

| ID | Term       | Annotated                                | Significant | Expected | elimFisher |
|----|------------|------------------------------------------|-------------|----------|------------|
| 1  | GO:0045335 | phagocytic vesicle                       | 6           | 6        | 1.1e-18    |
| 2  | GO:0000145 | exocyst                                  | 31          | 6        | 7.6e-13    |
| 3  | GO:0070062 | extracellular exosome                    | 32          | 6        | 9.4e-13    |
| 4  | GO:0009501 | amyloplast                               | 345         | 8        | 2.9e-09    |
| 5  | GO:0085042 | periarbuscular membrane                  | 292         | 6        | 6.9e-07    |
| 6  | GO:0000306 | extrinsic component of vacuolar membrane | 30          | 3        | 4.7e-06    |
| 7  | GO:0000139 | Golgi membrane                           | 2435        | 12       | 5.5e-06    |
| 8  | GO:0032586 | protein storage vacuole membrane         | 353         | 5        | 3.8e-05    |
| 9  | GO:0016021 | integral component of membrane           | 11678       | 24       | 0.0001     |
| 10 | GO:0005618 | cell wall                                | 8035        | 16       | 0.0044     |
| 11 | GO:0009524 | phragmoplast                             | 1638        | 6        | 0.0079     |
| 12 | GO:0005789 | endoplasmic reticulum membrane           | 6329        | 13       | 0.0123     |
| 13 | GO:0009535 | chloroplast thylakoid membrane           | 2665        | 7        | 0.0227     |
| 14 | GO:0005654 | nucleoplasm                              | 4943        | 10       | 0.0337     |

**Supplementary Table 08. Significantly enriched GO terms, Cellular component (CC).** CC-GOs were obtained for the *expanded gene families*. We provide a GO-Id, the term, its annotation, the significance and expected values and the P-value (elimFisher calculated, one-sided test) for each GO.

| ID | Term       | Annotated                                   | Significant | Expected | elimFisher |
|----|------------|---------------------------------------------|-------------|----------|------------|
| 1  | GO:0012511 | monolayer-surrounded lipid storage body     | 69          | 29       | < 1e-30    |
| 2  | GO:0042597 | periplasmic space                           | 13          | 13       | 8.2e-27    |
| 3  | GO:0033115 | cyanelle thylakoid membrane                 | 224         | 22       | 1.3e-15    |
| 4  | GO:0070111 | organellar chromatophore                    | 260         | 21       | 6.1e-12    |
| 5  | GO:0009539 | photosystem II reaction center              | 45          | 10       | 2.1e-11    |
| 6  | GO:0005763 | mitochondrial small ribosomal subunit       | 142         | 13       | 2.3e-09    |
| 7  | GO:0009535 | chloroplast thylakoid membrane              | 2665        | 59       | 6.8e-09    |
| 8  | GO:0009523 | photosystem II                              | 213         | 23       | 1.2e-08    |
| 9  | GO:0033095 | aleurone grain                              | 176         | 11       | 1.9e-06    |
| 10 | GO:0043245 | extraorganismal space                       | 66          | 7        | 4.5e-06    |
| 11 | GO:0005811 | lipid droplet                               | 347         | 39       | 0.00027    |
| 12 | GO:0009842 | cyanelle                                    | 909         | 39       | 0.00031    |
| 13 | GO:0000322 | storage vacuole                             | 325         | 11       | 0.00049    |
| 14 | GO:0005615 | extracellular space                         | 961         | 21       | 0.00079    |
| 15 | GO:0000785 | chromatin                                   | 641         | 16       | 0.00085    |
| 16 | GO:0005835 | fatty acid synthase complex                 | 8           | 2        | 0.00270    |
| 17 | GO:0010287 | plastoglobule                               | 527         | 13       | 0.00281    |
| 18 | GO:0070118 | organellar chromatophore thylakoid membr... | 101         | 5        | 0.00357    |
| 19 | GO:0005576 | extracellular region                        | 9339        | 127      | 0.00561    |
| 20 | GO:0000932 | P-body                                      | 564         | 12       | 0.01228    |
| 21 | GO:0009579 | thylakoid                                   | 3760        | 75       | 0.03675    |

**Supplementary Table 09. Significantly enriched GO terms, Molecular Function (MF).** MF-GOs were obtained for the *contracted gene families*. We provide a GO-Id, the term, its annotation, the significance and expected values and the P-value (elimFisher calculated, one-sided test) for each GO.

| ID | Term       | Annotated                                   | Significant | Expected | elimFisher |
|----|------------|---------------------------------------------|-------------|----------|------------|
| 1  | GO:0047434 | indolepyruvate decarboxylase activity       | 15          | 9        | 6.3e-24    |
| 2  | GO:0103075 | indole-3-pyruvate monooxygenase activity    | 16          | 9        | 1.4e-23    |
| 3  | GO:0004499 | N,N-dimethylaniline monooxygenase activi... | 23          | 9        | 1.0e-21    |
| 4  | GO:0061630 | ubiquitin protein ligase activity           | 581         | 14       | 1.4e-15    |
| 5  | GO:0051787 | misfolded protein binding                   | 170         | 8        | 1.8e-11    |
| 6  | GO:0050660 | flavin adenine dinucleotide binding         | 380         | 9        | 3.9e-10    |
| 7  | GO:0050661 | NADP binding                                | 450         | 9        | 1.7e-09    |
| 8  | GO:0080102 | 3-methylthiopropyl glucosinolate S-oxyge... | 17          | 4        | 3.6e-09    |
| 9  | GO:0080103 | 4-methylthiopropyl glucosinolate S-oxyge... | 17          | 4        | 3.6e-09    |
| 10 | GO:0080104 | 5-methylthiopropyl glucosinolate S-oxyge... | 17          | 4        | 3.6e-09    |
| 11 | GO:0080105 | 6-methylthiopropyl glucosinolate S-oxyge... | 17          | 4        | 3.6e-09    |
| 12 | GO:0080106 | 7-methylthiopropyl glucosinolate S-oxyge... | 17          | 4        | 3.6e-09    |
| 13 | GO:0080107 | 8-methylthiopropyl glucosinolate S-oxyge... | 17          | 4        | 3.6e-09    |
| 14 | GO:0062047 | pipecolic acid N-hydroxylase                | 12          | 2        | 8.6e-05    |
| 15 | GO:0031543 | peptidyl-proline dioxygenase activity       | 30          | 2        | 0.00056    |
| 16 | GO:0043621 | protein self-association                    | 3085        | 10       | 0.00209    |
| 17 | GO:0031624 | ubiquitin conjugating enzyme binding        | 59          | 2        | 0.00216    |
| 18 | GO:0030247 | polysaccharide binding                      | 1883        | 7        | 0.00532    |
| 19 | GO:0031625 | ubiquitin protein ligase binding            | 1990        | 6        | 0.02581    |
| 20 | GO:0005199 | structural constituent of cell wall         | 252         | 2        | 0.03469    |

**Supplementary Table 10. Significantly enriched GO terms, Molecular Function (MF).** MF-GOs were obtained for the *expanded gene families*. We provide a GO-Id, the term, its annotation, the significance and expected values and the P-value (elimFisher calculated, one-sided test) for each GO.

| ID | Term       | Annotated                                   | Significant | Expected | elimFisher |
|----|------------|---------------------------------------------|-------------|----------|------------|
| 1  | GO:0047434 | indolepyruvate decarboxylase activity       | 15          | 9        | 6.3e-24    |
| 2  | GO:0103075 | indole-3-pyruvate monooxygenase activity    | 16          | 9        | 1.4e-23    |
| 3  | GO:0004499 | N,N-dimethylaniline monooxygenase activi... | 23          | 9        | 1.0e-21    |
| 4  | GO:0061630 | ubiquitin protein ligase activity           | 581         | 14       | 1.4e-15    |
| 5  | GO:0051787 | misfolded protein binding                   | 170         | 8        | 1.8e-11    |
| 6  | GO:0050660 | flavin adenine dinucleotide binding         | 380         | 9        | 3.9e-10    |

|    |            |                                             |      |    |         |
|----|------------|---------------------------------------------|------|----|---------|
| 7  | GO:0050661 | NADP binding                                | 450  | 9  | 1.7e-09 |
| 8  | GO:0080102 | 3-methylthiopropyl glucosinolate S-oxyge... | 17   | 4  | 3.6e-09 |
| 9  | GO:0080103 | 4-methylthiopropyl glucosinolate S-oxyge... | 17   | 4  | 3.6e-09 |
| 10 | GO:0080104 | 5-methylthiopropyl glucosinolate S-oxyge... | 17   | 4  | 3.6e-09 |
| 11 | GO:0080105 | 6-methylthiopropyl glucosinolate S-oxyge... | 17   | 4  | 3.6e-09 |
| 12 | GO:0080106 | 7-methylthiopropyl glucosinolate S-oxyge... | 17   | 4  | 3.6e-09 |
| 13 | GO:0080107 | 8-methylthiopropyl glucosinolate S-oxyge... | 17   | 4  | 3.6e-09 |
| 14 | GO:0062047 | pipecolic acid N-hydroxylase                | 12   | 2  | 8.6e-05 |
| 15 | GO:0031543 | peptidyl-proline dioxygenase activity       | 30   | 2  | 0.00056 |
| 16 | GO:0043621 | protein self-association                    | 3085 | 10 | 0.00209 |
| 17 | GO:0031624 | ubiquitin conjugating enzyme binding        | 59   | 2  | 0.00216 |
| 18 | GO:0030247 | polysaccharide binding                      | 1883 | 7  | 0.00532 |
| 19 | GO:0031625 | ubiquitin protein ligase binding            | 1990 | 6  | 0.02581 |
| 20 | GO:0005199 | structural constituent of cell wall         | 252  | 2  | 0.03469 |

**Supplementary Figure 01. IsoSeq Transcriptome data report.** A) % of isoforms per gene, showing different categories labeled by colours. B) % of transcripts which are mono or multi-exon; C) Count of all Isoseq transcript length; D) Cunt of multi and mono-exon transcripts.

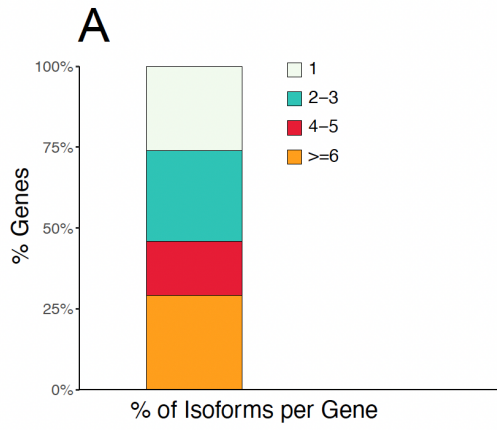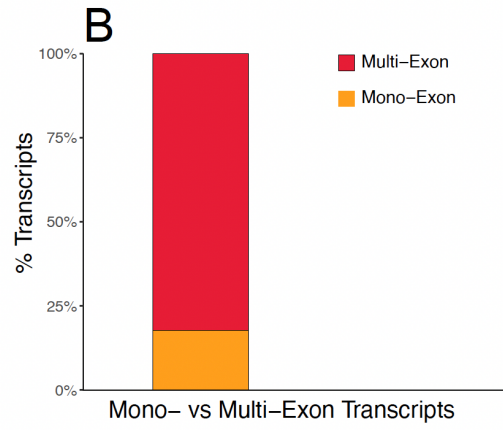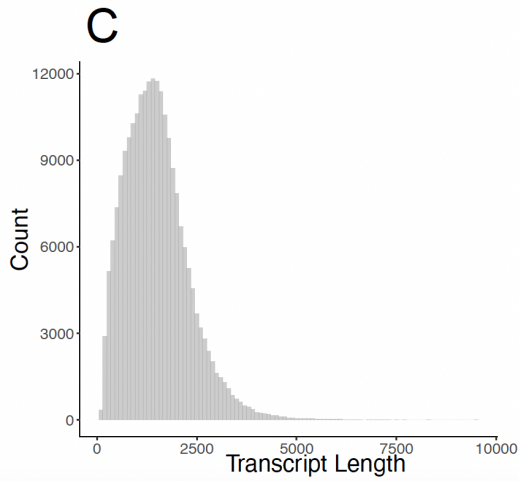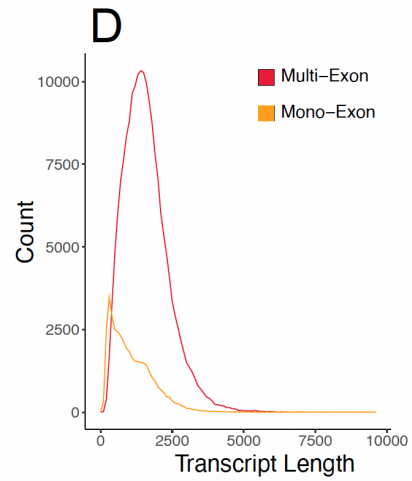

**Supplementary Figure 02. Upset plot including five Asteraceae genome assemblies.** For each genome we present the number of orthogroups which include genomes from different combinations. For instance, there are 9,191 orthogroups including the five genomes.

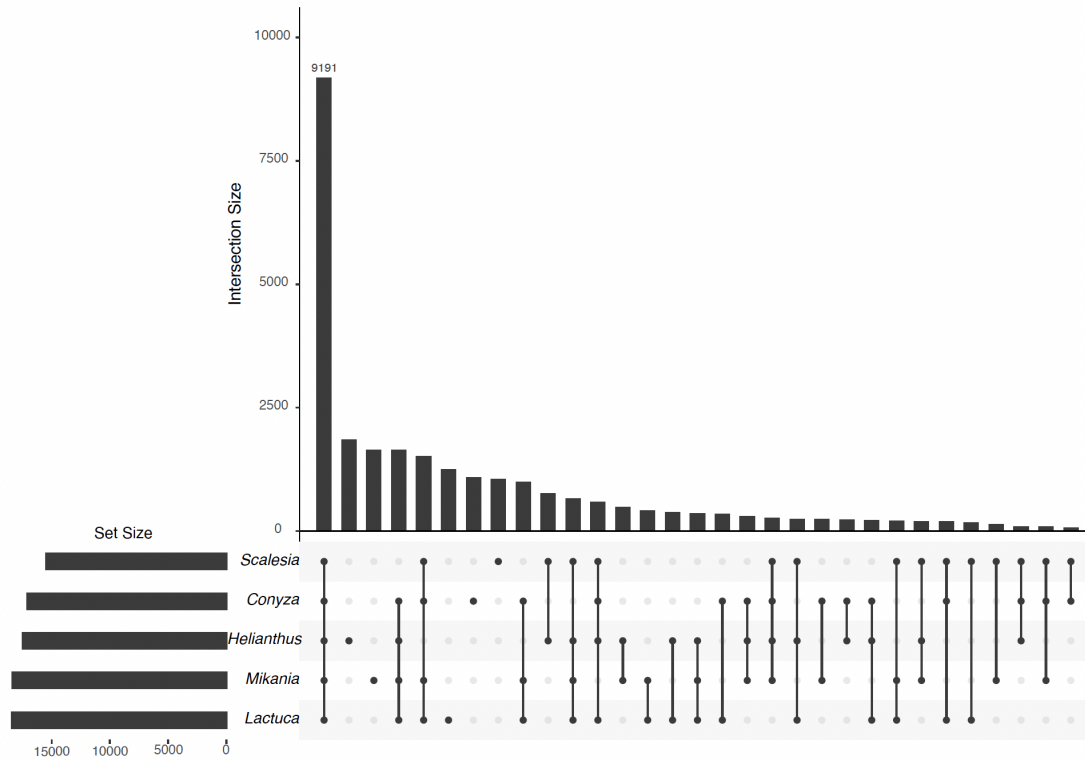



**Supplementary Figure 03. Hierarchical clustering of selected  $k$ -mers.** A selection of 13-mers present in high abundance ( $>100$ ) in the *Scalesia atractyloides* genome assembly, and differentially represented in homologous chromosomes. Hierarchical clustering separated the subgenomes.

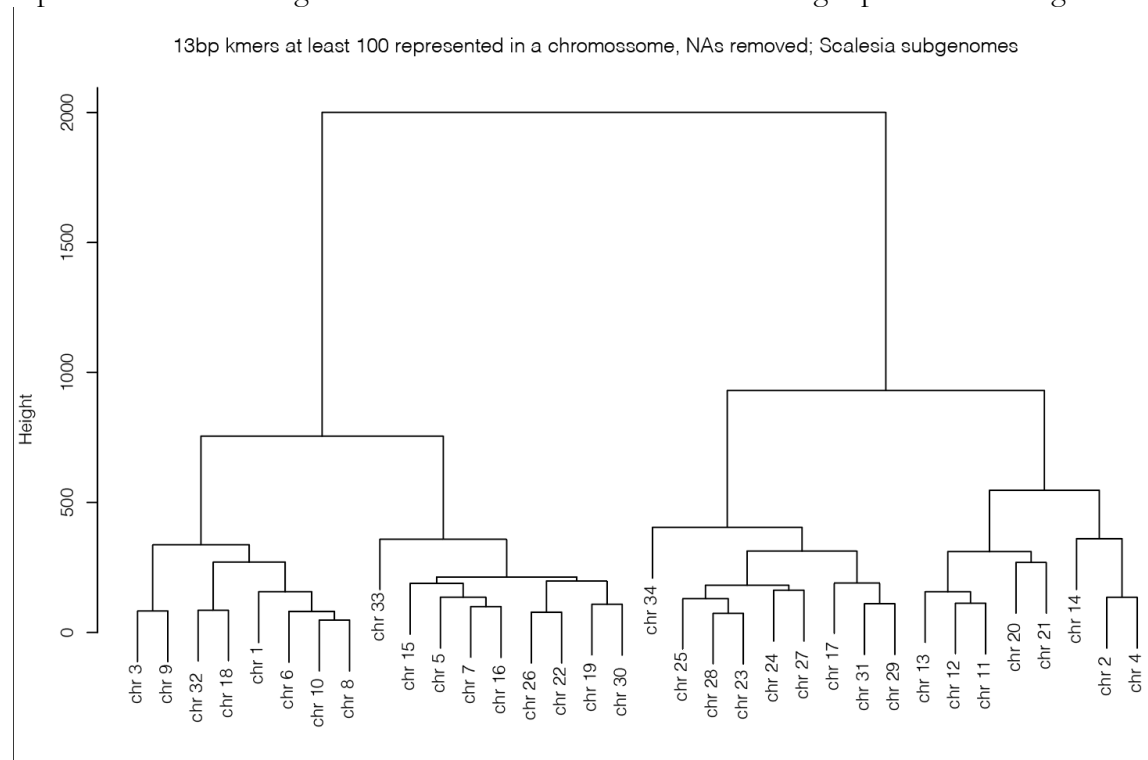

**Supplementary Figure 04.  $K_s$  plots.**  $K_s$  plots for *Scalesia* subgenome A vs subgenome B (top), *Scalesia* subgenome A vs *Helianthus* (middle), and *Scalesia* subgenome B vs *Helianthus* (bottom). For each comparison, we report the peak of the distribution for each component.

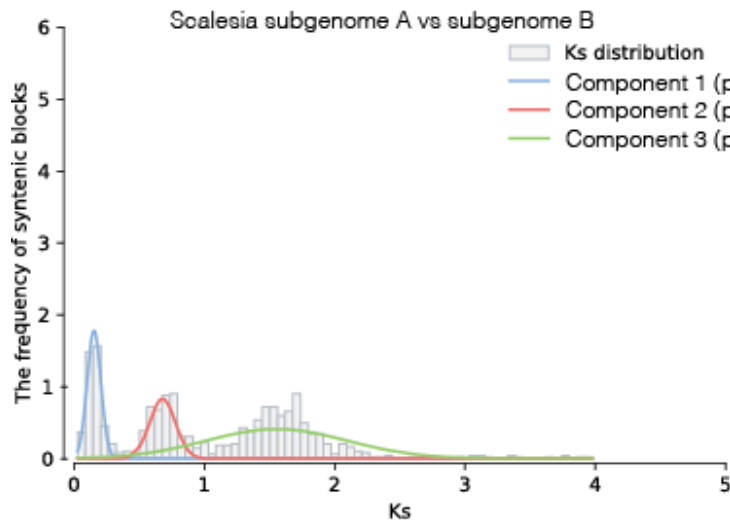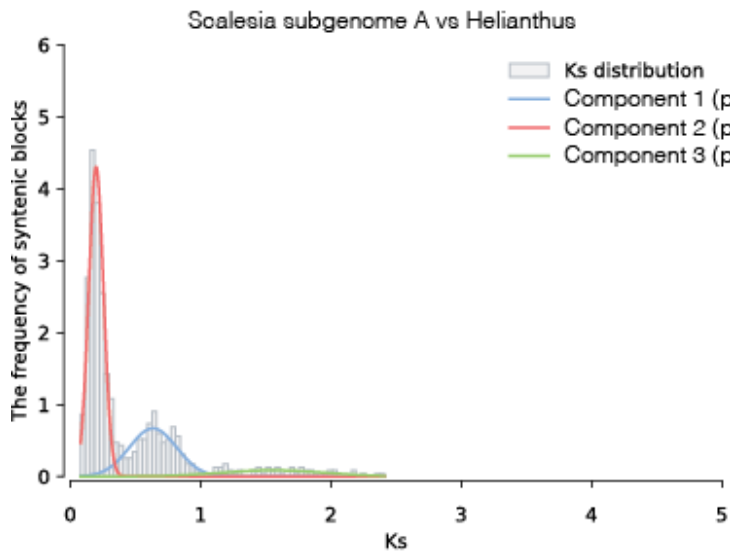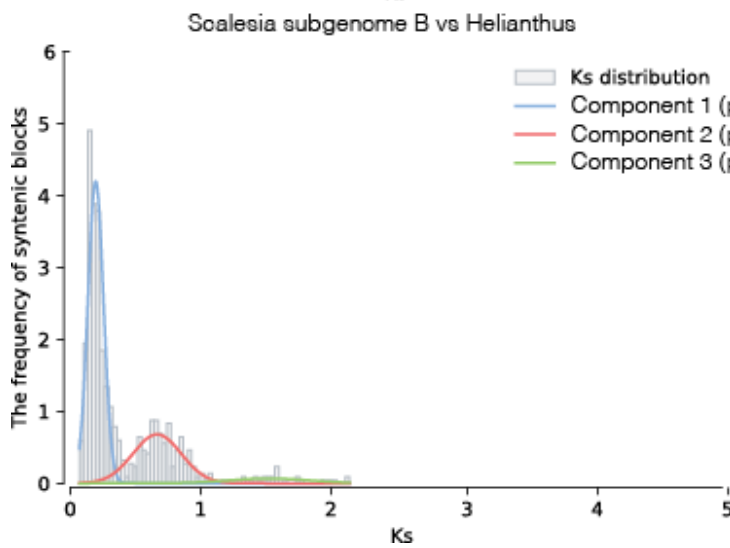

**Supplementary Figure 05. Differences in transposable element and repeat content per subgenome.** For each family identified by RepeatMasker (*x*-axis), we plot the difference between transposable elements for TE-number differences between subgenomes, for each TE-family.

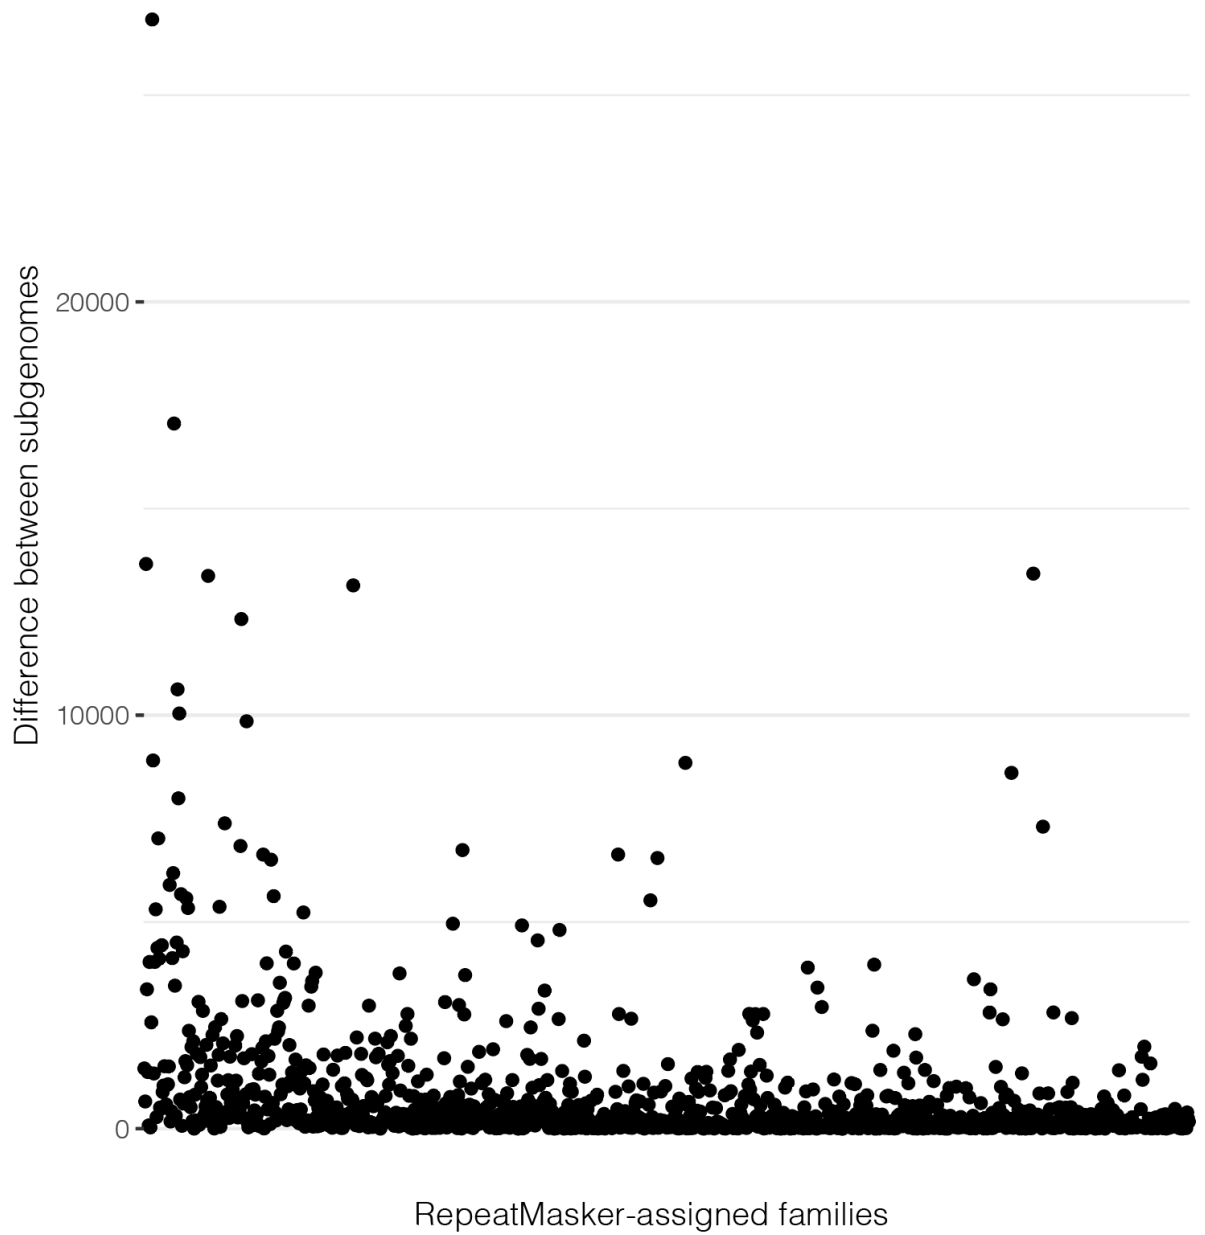

**Supplementary Figure 06. Density distribution of pairwise comparisons of Jukes-Cantor divergence.** We selected LTR-families evenly represented on the subgenomes, and present in the *Helianthus* genome for this analysis. These families were cleaned by removing missing data and cleaning the sequences using Gblocks. We ended up with 5 high-quality LTR-repeat families, which were used for dating the polyploidization event. In yellow, we plot *Scalesia* vs *Scalesia* LTRs, and in grey we plot *Scalesia* vs *Helianthus* LTRs. The arrows point to the peak of the distribution, which was used to estimate the divergence between *Scalesia* subgenomes.

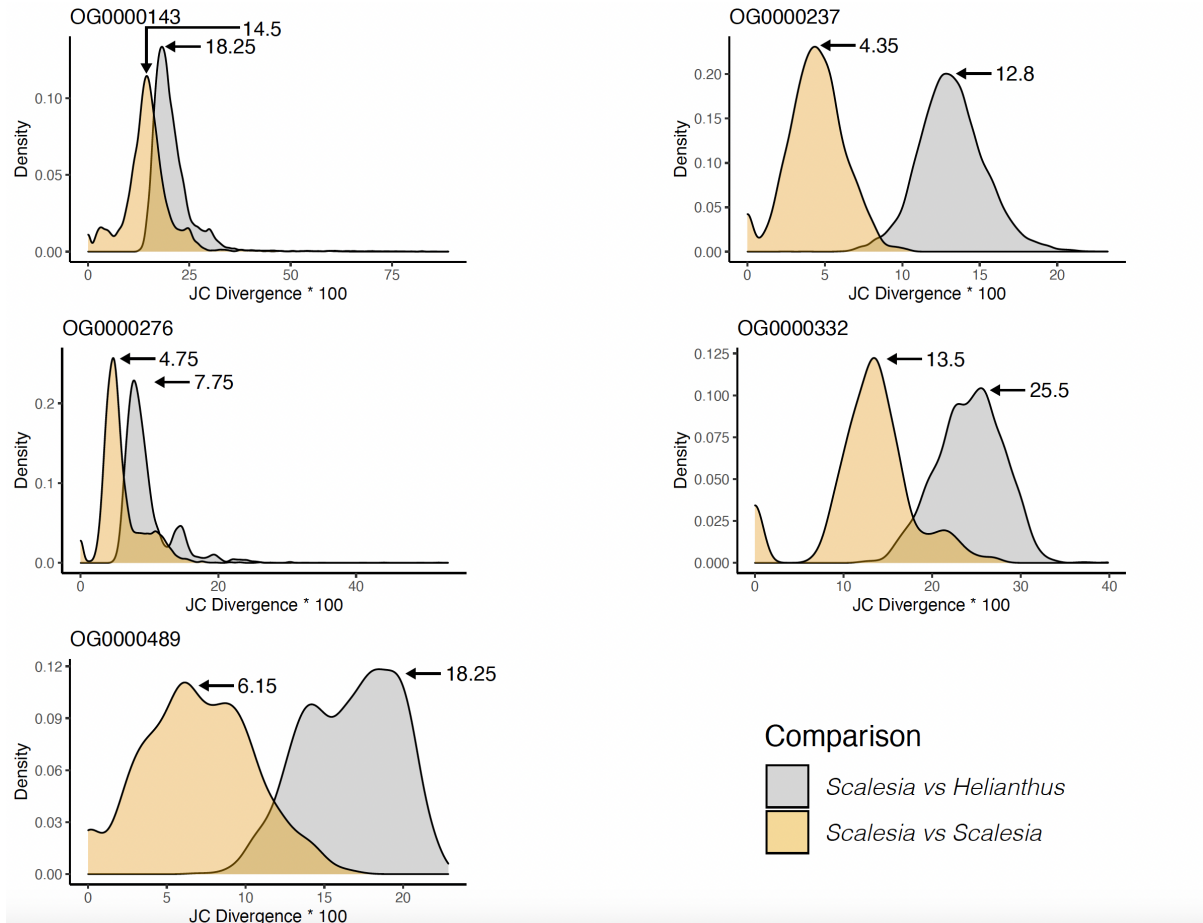

**Supplementary Figure 07. STRING analysis of *Scalesia* genes under selection.** To explore the potential protein-protein interactions among the *Scalesia* genes under selection, we performed a STRING analysis with the 632 closest Arabidopsis orthologs. Interaction scores of edges were calculated based on the parameters: Experiments, Co-expression, Neighborhood, Gene fusion and Co-occurrence. Edges with interaction score higher than 0.400 were kept in the network. After excluding genes with no physical connection, the STRING network had 627 nodes with 470 edges (PPI enrichment p-value <0.001). To simplify the densely connected network into potential biologically functional clusters, we used the distance matrix obtained from the STRING global scores as the input to perform a k-Means clustering analysis (number of clusters = 6). 4 out of the 6 clusters are enriched for biological processes related GO terms. Cluster 1 (red bubbles) were enriched for the GO term metabolic processes, cluster 3 (lime green bubbles) for histone modifications and chromosome organization, cluster 4 (green bubbles) for response to light, and cluster 6 (purple bubbles) for ribosomal large subunit biogenesis and RNA-processing.

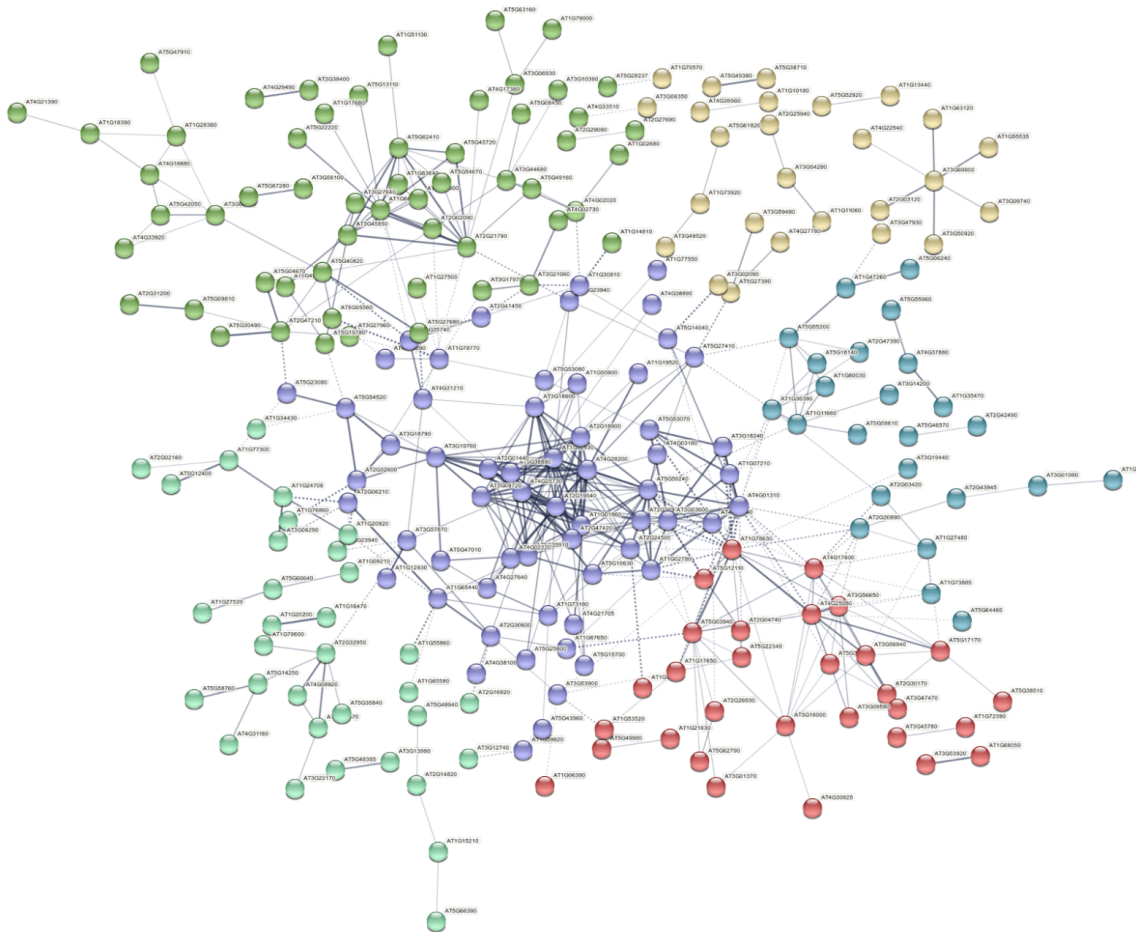

Supplement: 41467_2022_31280_MOESM1_ESM.pdf [file 41467_2022_31280_MOESM1_ESM.pdf]
